# Supplementary material for: Identification of a new QTL underlying seminal root number in a maize-teosinte population
Source: Frontiers journal article supplement (doi:10.3389/fpls.2023.1132017), 2023-02-07
Supplement: Data_Sheet_1.pdf [file Data_Sheet_1.pdf]

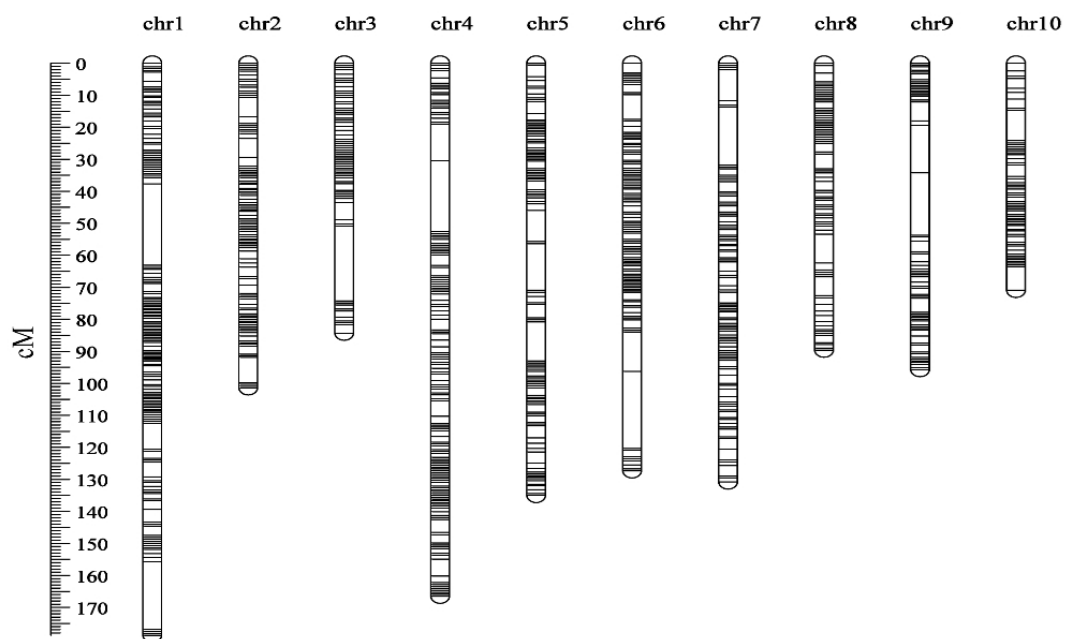

**Supplementary Figure 1.** The genetic linkage map constructed based on the bin makers. The black lines on each chromosome indicate the genetic location of the bin makers.
