# Supplementary material for: Identification of a new QTL underlying seminal root number in a maize-teosinte population
Source: Frontiers journal article supplement (doi:10.3389/fpls.2023.1132017), 2023-02-07
Supplement: Data_Sheet_2.pdf [file Data_Sheet_2.pdf]

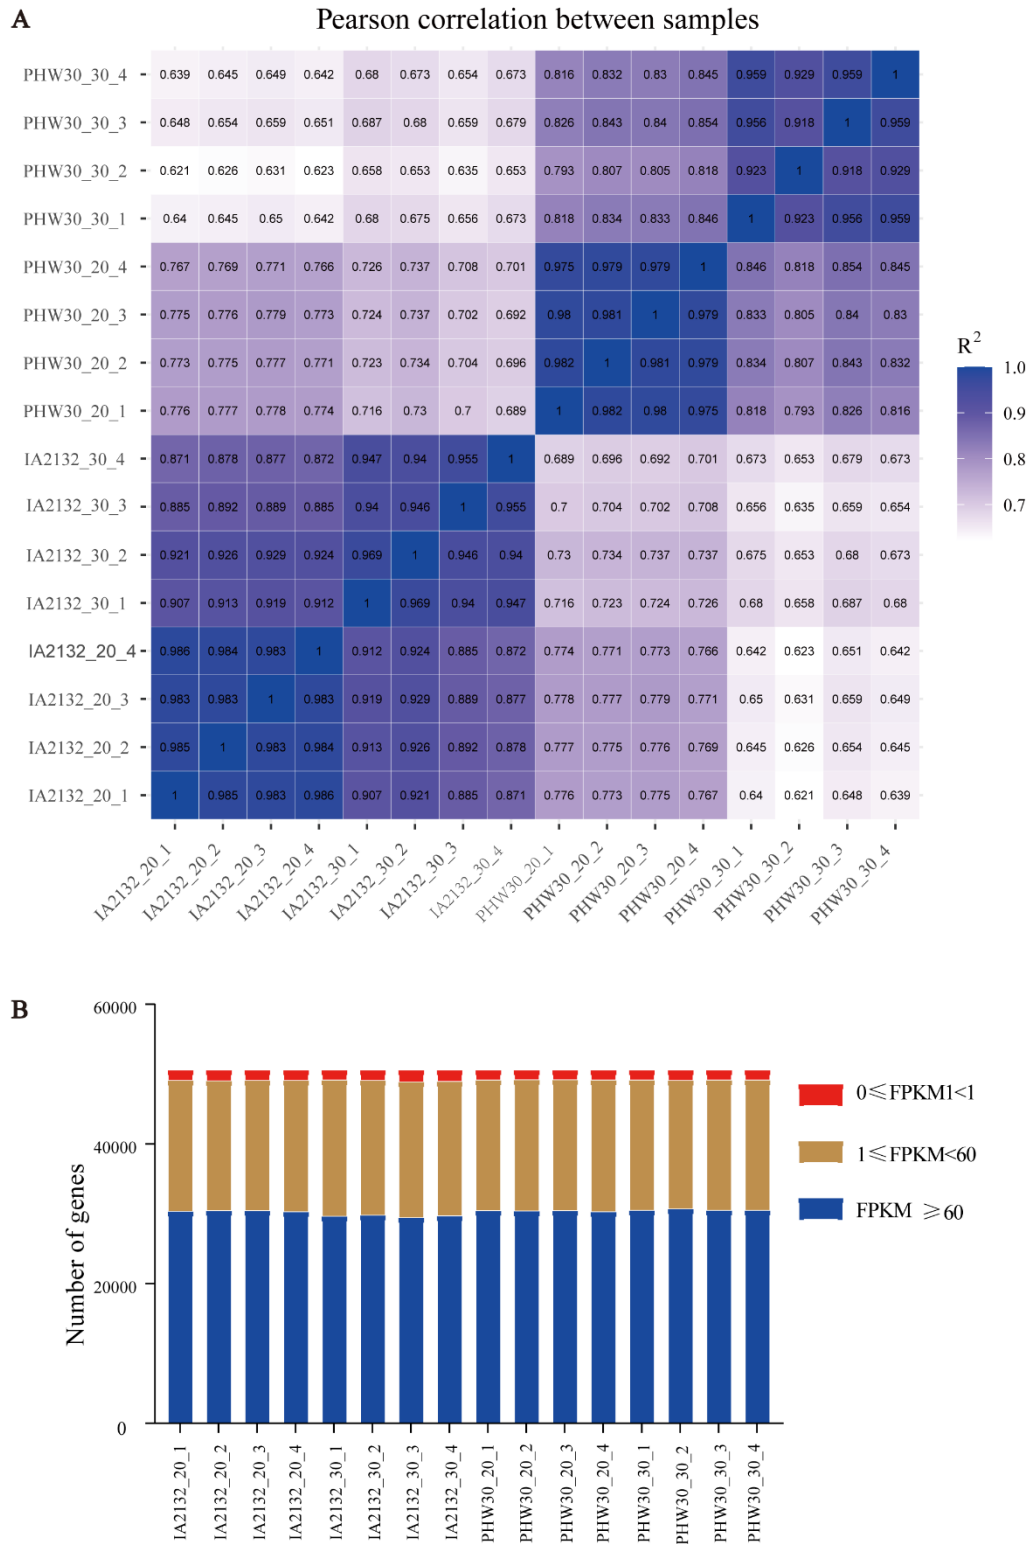

**Supplementary Figure 2.** Gene expression levels and their correlation among samples. (A) Heat maps showing the correlations between the transcriptomes of four biological replicates for each genotype among the two genotypes investigated at the 20<sup>th</sup> and 30<sup>th</sup> day after pollination. IA2132\_20 and PHW30\_20 represent DEGs at the 20<sup>th</sup> day after pollination. Similarly, IA2132\_30 and PHW30\_30 represent DEGs at the 30<sup>th</sup> day after pollination. (B) gene expression levels for 16 samples at the 20<sup>th</sup> and 30<sup>th</sup> day after pollination.
