# Supplementary material for: Identification of a new QTL underlying seminal root number in a maize-teosinte population
Source: Frontiers journal article supplement (doi:10.3389/fpls.2023.1132017), 2023-02-07
Supplement: Data_Sheet_4.pdf [file Data_Sheet_4.pdf]

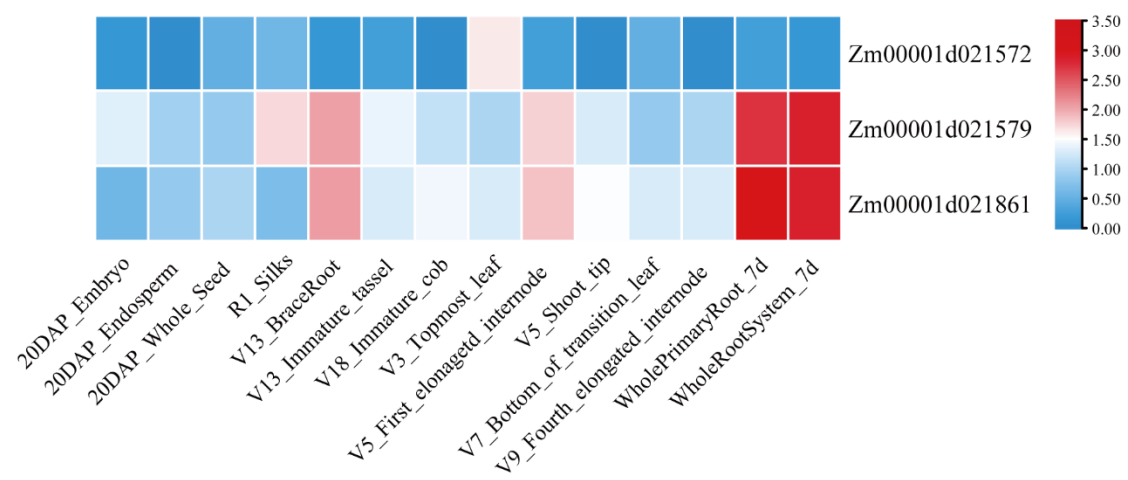

**Supplementary Figure 4.** Tissue expression heatmap of genes Zm00001d021572, Zm00001d021579 and Zm00001d021861 in maize inbred line B73.
