# Supplementary material for: Identification of a new QTL underlying seminal root number in a maize-teosinte population
Source: Front Plant Sci. 2023 Feb 7;14:1132017. doi: 10.3389/fpls.2023.1132017 (PMC9941338; doi:10.3389/fpls.2023.1132017)
Supplement: Supplementary file 6 [file Table_2.xlsx]

## Sheet: Sheet1
Supplementary Table 2. The number and percentage of reads to the unique location of the reference genome were mapped
Sample	Total_reads	Total_map	Unique_map
IA2132_20_1	48618620	43829347(90.15%)	42305053(87.01%)
IA2132_20_2	51825698	46703346(90.12%)	45130116(87.08%)
IA2132_20_3	41973480	37904572(90.31%)	36632956(87.28%)
IA2132_20_4	43003544	38774143(90.16%)	37504102(87.21%)
IA2132_30_1	43429874	38860710(89.48%)	37432203(86.19%)
IA2132_30_2	39082598	35056968(89.7%)	33804402(86.49%)
IA2132_30_3	38810454	34119298(87.91%)	32625116(84.06%)
IA2132_30_4	44750434	39471759(88.2%)	38059213(85.05%)
PHW30_20_1	40380520	36442857(90.25%)	35123670(86.98%)
PHW30_20_2	43886318	39594971(90.22%)	38143755(86.91%)
PHW30_20_3	40773548	36862786(90.41%)	35562210(87.22%)
PHW30_20_4	40137706	36201383(90.19%)	34908248(86.97%)
PHW30_30_1	41558216	37303070(89.76%)	36178130(87.05%)
PHW30_30_2	49529742	44269626(89.38%)	42996506(86.81%)
PHW30_30_3	40207072	36158995(89.93%)	35123128(87.36%)
PHW30_30_4	51852120	46600416(89.87%)	45220709(87.21%)
