# Supplementary material for: Identification of a new QTL underlying seminal root number in a maize-teosinte population
Source: Front Plant Sci. 2023 Feb 7;14:1132017. doi: 10.3389/fpls.2023.1132017 (PMC9941338; doi:10.3389/fpls.2023.1132017)
Supplement: Supplementary file 7 [file Table_3.xlsx]

## Sheet: Sheet1
Supplementary Table 3. Common differentially expressed genes in the QTL-qKSRN7 interval.
No.	Gene ID
1	Zm00001d021565
2	Zm00001d021569
3	Zm00001d021570
4	Zm00001d021572
5	Zm00001d021574
6	Zm00001d021576
7	Zm00001d021579
8	Zm00001d021583
9	Zm00001d021595
10	Zm00001d021596
11	Zm00001d021598
12	Zm00001d021599
13	Zm00001d021614
14	Zm00001d021627
15	Zm00001d021628
16	Zm00001d021629
17	Zm00001d021632
18	Zm00001d021638
19	Zm00001d021645
20	Zm00001d021647
21	Zm00001d021649
22	Zm00001d021653
23	Zm00001d021654
24	Zm00001d021655
25	Zm00001d021659
26	Zm00001d021665
27	Zm00001d021666
28	Zm00001d021667
29	Zm00001d021672
30	Zm00001d021673
31	Zm00001d021680
32	Zm00001d021682
33	Zm00001d021686
34	Zm00001d021687
35	Zm00001d021688
36	Zm00001d021690
37	Zm00001d021692
38	Zm00001d021702
39	Zm00001d021703
40	Zm00001d021705
41	Zm00001d021706
42	Zm00001d021707
43	Zm00001d021708
44	Zm00001d021711
45	Zm00001d021714
46	Zm00001d021718
47	Zm00001d021724
48	Zm00001d021731
49	Zm00001d021737
50	Zm00001d021740
51	Zm00001d021745
52	Zm00001d021746
53	Zm00001d021748
54	Zm00001d021752
55	Zm00001d021753
56	Zm00001d021760
57	Zm00001d021762
58	Zm00001d021764
59	Zm00001d021772
60	Zm00001d021773
61	Zm00001d021775
62	Zm00001d021778
63	Zm00001d021779
64	Zm00001d021791
65	Zm00001d021793
66	Zm00001d021804
67	Zm00001d021810
68	Zm00001d021812
69	Zm00001d021813
70	Zm00001d021814
71	Zm00001d021836
72	Zm00001d021838
73	Zm00001d021839
74	Zm00001d021842
75	Zm00001d021844
76	Zm00001d021845
77	Zm00001d021861
78	Zm00001d021864
79	Zm00001d021868
80	Zm00001d021873
81	Zm00001d021879
82	Zm00001d021881
83	Zm00001d021891
84	Zm00001d021899
85	Zm00001d021900
86	Zm00001d021906
87	Zm00001d021908
88	Zm00001d021909
89	Zm00001d021915
90	Zm00001d021929
91	Zm00001d021932
92	Zm00001d021946
93	Zm00001d021948
94	Zm00001d021950
95	Zm00001d021954
96	Zm00001d021955
97	Zm00001d021956
98	Zm00001d021960
99	Zm00001d021966
100	Zm00001d021971
101	Zm00001d021973
102	Zm00001d021976
103	Zm00001d021985
104	Zm00001d022001
105	Zm00001d022005
106	Zm00001d022006
107	Zm00001d022017
108	Zm00001d022025
109	Zm00001d022026
110	Zm00001d022032
111	Zm00001d022037
112	Zm00001d022041
113	Zm00001d022043
114	Zm00001d022044
115	Zm00001d022052
116	Zm00001d022069
